19. Casadevall N, Nataf J, Viron B *et al*. Pure red cell aplasia and antierythropoietin antibodies in patients treated with recombinant erythropoietin. *N Engl J Med* 2002; 346: 469–475
20. Koren E, Zuckerman LA, Mire-Sluis AR. Immune responses to therapeutic proteins in humans—clinical significance, assessment and prediction. *Curr Pharm Biotechnol* 2002; 3: 349–360
21. Cleland JL, Powell MF, Shire SJ. The development of stable protein formulations: a close look at protein aggregation, deamidation, and oxidation. *Crit Rev Ther Drug Carrier Syst* 1993; 10: 307–377
22. Högglund M. Glycosylated and non-glycosylated recombinant human granulocyte colony-stimulating factor (rhG-CSF)—what is the difference? *Med Oncol* 1998; 15: 229–233
23. Dove A. Uncorking the biomanufacturing bottleneck. *Nat Biotechnol* 2002; 20: 777–779
24. Restelli V, Wang MD, Huzel N *et al*. The effect of dissolved oxygen on the production and the glycosylation profile of recombinant human erythropoietin produced from CHO cells. *Biotechnol Bioeng* 2006; 94: 481–494
25. Misaizu T, Matsuki S, Strickland TW *et al*. Role of antennary structure of N-linked sugar chains in renal handling of recombinant human erythropoietin. *Blood* 1995; 86: 4097–4104
26. Sharma B. Immunogenicity of therapeutic proteins: Part 2. Impact of container closures. *Biotechnol Adv* 2007a; 25: 318–324
27. Sharma B. Immunogenicity of therapeutic proteins: Part 1. Impact of product handling. *Biotechnol Adv* 2007b; 25: 310–317
28. Li S, Schöneich C, Borchardt RT. Chemical instability of protein pharmaceuticals: mechanisms of oxidation and strategies for stabilization. *Biotechnol Bioeng* 1995; 48: 490–500
29. Schellekens H. Immunogenicity of therapeutic proteins: clinical implications and future prospects. *Clin Ther* 2002; 24: 1720–1740
30. Hermeling S, Crommelin DJ, Schellekens H *et al*. Structure-immunogenicity relationships of therapeutic proteins. *Pharm Res* 2004; 21: 897–903
31. Rosenberg AS. Effects of protein aggregates: an immunologic perspective. *AAPS J* 2006; 8: E501–E507
32. Schellekens H. The first biosimilar epoetin: but how similar is it? *Clin J Am Soc Nephrol* 2008; 3: 174–178
33. Schellekens H. Erythropoietic proteins and antibody-mediated pure red cell aplasia: a potential role for micelles. *Nephrol Dial Transplant* 2004; 19: 2422
34. Jenkins N. Modifications of therapeutic proteins: challenges and prospects. *Cytotechnology* 2007; 53: 121–125
35. Boylan JC, Swarbrick J. *Encyclopedia of Pharmaceutical Technology*, 2nd edn. New York: Marcel Dekker, Inc., 2002: 214
36. EMEA Committee for Medicinal Products for Human Use. Guidelines on similar biological medicinal products containing biotechnology-derived proteins as active substance: non-clinical and clinical issues. London, 2006 Available at: <http://www.emea.eu.int/>
37. EMEA Committee for Medicinal Products for Human Use. Guidelines on similar biological medicinal products containing biotechnology-derived proteins as active substance: quality issues. London, 2006. Available at: <http://www.emea.eu.int/>
38. Mellstedt H, Niederwasser D, Ludwig H. The challenge of biosimilars. *Ann Oncol* 2008; 19: 411–419
39. Locatelli F, Goldsmith D. Biosimilars: uncharted territory. *J Nephrol* 2007; 20: 265–267
40. European Biopharmaceutical Enterprises. EBE-EFPIA Position paper: inapplicability of automatic substitution rules to biotechnology products, including biosimilar medicinal products: recommendation for addressing unique safety concerns. 31 July 2006. Available at: <http://www.ebe-biopharma.org>
41. European Biopharmaceutical Enterprises. EBE-EFPIA Position paper: Naming of biosimilar medicinal products: options for addressing unique safety concerns. 7 July 2006. Available at: <http://www.ebe-biopharma.org>
42. [http://www.who.int/medicines/services/inn/46thINNconsultation\\_ExecSummary.pdf](http://www.who.int/medicines/services/inn/46thINNconsultation_ExecSummary.pdf)

Received for publication: 1.7.08

Accepted in revised form: 22.8.08

Nephrol Dial Transplant (2008) 23: 3737–3743

doi: 10.1093/ndt/gfn531

Advance Access publication 22 September 2008

## Neutrophil gelatinase-associated lipocalin—an emerging troponin for kidney injury

Prasad Devarajan

Division of Nephrology and Hypertension, Cincinnati Children's Hospital Medical Center, University of Cincinnati College of Medicine, Cincinnati, OH 45229-3039, USA

**Keywords:** acute kidney injury; acute renal failure; biomarker; lipocalin; nephrotoxicity

### Introduction

When a subject presents with symptoms of *angina pectoris*, measurement of biomarkers such as troponin that are released from damaged myocytes can rapidly identify acute myocardial injury, allowing for timely interventions and a dramatic decrease in mortality. The analogous condition of the kidney, acute kidney injury (AKI), has been referred to as *angina renalis*, and the similarities end right there. AKI is largely asymptomatic, and establishing the diagnosis in the estimated 5% of hospitalized patients and a third of

Correspondence and offprint requests to: Prasad Devarajan, MLC 7022, 3333 Burnet Avenue, Cincinnati, OH 45229-3039, USA. Tel: +1-513-636-4531; Fax: +1-513-636-7407; E-mail: [prasad.devarajan@cchmc.org](mailto:prasad.devarajan@cchmc.org)

intensive care patients who suffer from the disease currently hinges on serial serum creatinine measurements. Unfortunately, creatinine is a notoriously delayed and unreliable indicator of AKI for a variety of reasons [1,2]. Ironically, animal studies have identified several interventions that can prevent and/or treat AKI if instituted early in the disease course, well before the serum creatinine even begins to rise. The lack of early biomarkers has crippled our ability to translate these promising findings, and human AKI remains a major risk factor for a number of non-renal complications and an independent contributor to the high mortality rate [3].

The pursuit of improved biomarkers for the early diagnosis of AKI and its outcomes is an area of intense contemporary research. For answers, we must turn to the kidney itself. Indeed, understanding the early stress response of the kidney to acute injuries has revealed a number of potential biomarkers [4–7]. The bench-to-bedside journey of neutrophil gelatinase-associated lipocalin (NGAL), arguably the most promising novel AKI biomarker, is chronicled below.

## Biology of NGAL

Human NGAL was originally identified as a 25-kDa protein covalently bound to gelatinase from neutrophils [8–10]. Like other lipocalins, NGAL forms a barrel-shaped tertiary structure with a hydrophobic calyx that binds small lipophilic molecules [11]. The major ligands for NGAL are siderophores, small iron-binding molecules. On the one hand, siderophores are synthesized by bacteria to acquire iron, and NGAL exerts a bacteriostatic effect by depleting siderophores. On the other hand, siderophores produced by eukaryotes participate in NGAL-mediated iron shuttling that is critical to various cellular responses such as proliferation and differentiation [11]. Although NGAL is expressed only at very low levels in several human tissues, it is markedly induced in injured epithelial cells, including the kidney [10]. The promoter region of the NGAL gene contains binding sites for a number of transcription factors, including NF- $\kappa$ B [8,9]. NF- $\kappa$ B is known to be rapidly activated in kidney tubule cells after acute injuries [12] and plays a central role in controlling cell survival and proliferation [13]. These findings provide a potential molecular mechanism for the documented role of NGAL in enhancing the epithelial phenotype, both during kidney development and following AKI [10].

## NGAL for the early diagnosis of AKI

Preclinical transcriptome profiling studies identified *NGAL* (also known as lipocalin 2 or *lcn2*) to be one of the most upregulated genes in the kidney very early after acute injury in animal models [14–17]. Downstream proteomic analyses also revealed NGAL to be one of the most highly induced proteins in the kidney after ischemic or nephrotoxic AKI in animal models [18–20]. The serendipitous finding that NGAL protein was easily detected in the blood and urine soon after AKI has initiated a number of translational stud-

ies to evaluate NGAL as a non-invasive biomarker in human AKI. In a cross-sectional study, adults with established AKI (doubling of serum creatinine) displayed a marked increase in urine and serum NGAL by western blotting when compared to normal controls [20]. Urine and serum NGAL levels correlated with serum creatinine, and kidney biopsies in subjects with AKI showed intense accumulation of immunoreactive NGAL in cortical tubules, confirming NGAL as a sensitive index of established AKI in humans.

A number of studies have now implicated NGAL as an early diagnostic biomarker for AKI in common clinical situations. In prospective studies of children, with normal kidney function and no comorbid conditions, who underwent elective cardiac surgery, AKI (defined as a 50% increase in serum creatinine) occurred in ~30% of the subjects, 2–3 days after surgery [21–23]. In contrast, NGAL measurements by ELISA revealed a 10-fold or more increase in the urine and plasma, within 2–6 h of the surgery in those who subsequently developed AKI. Both urine and plasma NGAL were excellent independent predictors of AKI, with an area under the curve (AUC) of >0.9 for the 2–6-h urine and plasma NGAL measurements [21–23]. These findings have now been confirmed in prospective studies of adults who developed AKI after cardiac surgery, in whom urinary NGAL was significantly elevated by 1–3 h after the operation [24,25]. AKI, defined as a 50% increase in serum creatinine, did not occur until 2–3 days later. The AUCs for the prediction of AKI were in the 0.71–0.80 range, the somewhat inferior performance perhaps reflective of confounding variables such as old age, pre-existing kidney disease, prolonged bypass times, chronic illness and diabetes [25].

NGAL has also been evaluated as a biomarker of AKI in kidney transplantation. Protocol biopsies of kidneys obtained 1 h after vascular anastomosis revealed a significant correlation between NGAL staining intensity and the subsequent development of delayed graft function [26]. In a prospective multicenter study of children and adults, urine NGAL levels in samples collected on the day of transplant identified those who subsequently developed delayed graft function (which typically occurred 2–4 days later), with an AUC of 0.9 [27]. Plasma NGAL measurements have also been correlated with delayed graft function following kidney transplantation from donors after cardiac death [28].

Several investigators have examined the role of NGAL as a predictive biomarker of nephrotoxicity following contrast administration [29–33]. In a prospective study of children undergoing elective cardiac catheterization with contrast administration, both urine and plasma NGAL predicted contrast-induced nephropathy (defined as a 50% increase in serum creatinine from baseline) within 2 h after contrast administration, with an AUC of 0.91–0.92 [33]. In several studies of adults administered contrast, an early rise in both urine (4 h) and plasma (2 h) NGAL was documented, in comparison with a much later increase in plasma cystatin C levels (8–24 h after contrast administration), providing further support for NGAL as an early biomarker of contrast nephropathy [30,31].

Urine and plasma NGAL measurements also represent early biomarkers of AKI in the pediatric intensive care setting, being able to predict this complication ~2 days

prior to the rise in serum creatinine, with high sensitivity and AUCs of 0.68–0.78 [34,35]. In a recent study of adults in the emergency department setting, a single measurement of urine NGAL at the time of initial presentation predicted AKI with an outstanding AUC of 0.95, and reliably distinguished prerenal azotemia from intrinsic AKI and from chronic kidney disease (CKD) [36]. Thus, NGAL is a useful early AKI marker that predicts development of AKI even in heterogeneous groups of patients with multiple comorbidities and unknown timing of kidney injury.

Because of its high predictive properties for AKI, NGAL is also emerging as an early biomarker in interventional trials. For example, a reduction in urine NGAL has been employed as an outcome variable in clinical trials demonstrating the improved efficacy of a modern hydroxyethyl-starch preparation over albumin or gelatin in maintaining renal function in elderly cardiac surgery patients [37,38]. Similarly, the response of urine NGAL was attenuated in adult cardiac surgery patients who experienced a lower incidence of AKI after sodium bicarbonate therapy when compared to sodium chloride [39]. Furthermore, adults who developed AKI after aprotinin use during cardiac surgery displayed a dramatic rise in urine NGAL in the immediate post-operative period, attesting to the potential use of NGAL for the prediction of nephrotoxic AKI [40]. Not surprisingly, NGAL measurements as an outcome variable are currently included in at least 10 ongoing clinical trials formally listed in ClinicalTrials.gov. The approach of using NGAL as a trigger to initiate and monitor novel therapies, and as a safety biomarker when using potentially nephrotoxic agents, is expected to increase.

The results described thus far have been obtained using research-based assays, which are not practical in the clinical setting. In this regard, a major advance has been the development of a standardized point-of-care kit for the clinical measurement of plasma NGAL (Triage<sup>®</sup> NGAL Device, Biosite Inc., San Diego, CA, USA). In children undergoing cardiac surgery, the 2-h plasma NGAL measurement measured by the Triage<sup>®</sup> Device showed an AUC of 0.96, sensitivity of 0.84 and specificity of 0.94 for the prediction of AKI using a cutoff value of 150 ng/ml [41]. The assay is facile with quantitative results available in 15 min, and requires only microliter quantities of whole blood or plasma. In addition, a urine NGAL immunoassay has been developed for a standardized clinical platform (ARCHITECT<sup>®</sup> analyzer, Abbott Diagnostics, Abbott Park, IL, USA). In children undergoing cardiac surgery, the 2-h urine NGAL measurement by ARCHITECT<sup>®</sup> analyzer showed an AUC of 0.95, sensitivity of 0.79 and specificity of 0.92 for prediction of AKI using a cutoff value of 150 mg/ml [42]. This assay is also easy to perform with no manual pretreatment steps, a first result available within 35 min, and requires only 150  $\mu$ l of urine. Both kits are currently undergoing multicenter validation in adult populations.

### NGAL for the prognosis of AKI

Recent studies have demonstrated the utility of early NGAL measurements for predicting clinical outcomes of AKI. In

children undergoing cardiac surgery, the 2-h post-operative plasma NGAL levels measured by Triage<sup>®</sup> Device strongly correlated with duration and severity of AKI, and length of hospital stay. In addition, the 12-h plasma NGAL strongly correlated with mortality [41]. Similarly, the 2-h urine NGAL levels measured by ARCHITECT<sup>®</sup> analyzer highly correlated with duration and severity of AKI, length of hospital stay, dialysis requirement and death [42]. In a multicenter study of children with diarrhea-associated hemolytic uremic syndrome, urine NGAL obtained early during the hospitalization predicted the severity of AKI and dialysis requirement with high sensitivity [43]. Early urine NGAL levels were also predictive of duration of AKI (AUC 0.79) in a heterogeneous cohort of critically ill subjects [34]. In adults undergoing cardiopulmonary bypass, those who subsequently required renal replacement therapy were found to have the highest urine NGAL values upon arrival in the intensive care unit [25]. In adult kidney transplant patients undergoing either protocol biopsies or clinically indicated biopsies, urine NGAL measurements were found to be predictive of tubulitis or other tubular pathologies [44], raising the possibility of NGAL representing a non-invasive screening tool for the detection of tubulo-interstitial disease in the early months following kidney transplantation.

### Sources of urinary and plasma NGAL

The genesis and sources of plasma and urinary NGAL following AKI require further clarification. Although plasma NGAL is freely filtered by the glomerulus, it is largely reabsorbed in the proximal tubules by efficient megalin-dependent endocytosis [11]. Direct evidence for this notion is derived from systemic injection of labelled NGAL, which becomes enriched in the proximal tubule but does not appear in the urine in animals [20]. Thus, any urinary excretion of NGAL is likely only when there is concomitant proximal renal tubular injury that precludes NGAL reabsorption and/or increases *de novo* NGAL synthesis. However, gene expression studies in AKI have demonstrated a rapid and

**Table 1.** NGAL as an AKI biomarker

| Biomarker property                                              | NGAL             |
|-----------------------------------------------------------------|------------------|
| Specific to AKI (AKI versus CKD versus systemic disease)        | +/- <sup>a</sup> |
| Discern AKI sub-types (pre-renal azotemia versus intrinsic AKI) | Yes              |
| Sensitive to establish an early diagnosis                       | Yes              |
| Conserved across species                                        | Yes              |
| High gradient to allow early and easy detection                 | Yes              |
| Proportional increase with injury or loss of function           | Yes              |
| Associated with a known mechanism                               | Yes              |
| Results available while damage is limitable                     | Yes              |
| Results predict clinical outcomes                               | Yes              |
| Practical to measure                                            | Yes              |
| Amendable to existing platform assay methods                    | Yes              |

<sup>a</sup>Plasma NGAL may be detected in chronic kidney disease (CKD), chronic hypertension, systemic infections, inflammatory conditions and malignancies [51–56]. Urine NGAL may be detected in CKD, lupus nephritis and urinary tract infections [57–60]. In all these situations, NGAL values are generally substantially blunted compared to those typically measured in AKI.

**Table 2.** Urinary biomarkers for the early prediction of AKI in various clinical settings

| Biomarker name and property | Cardiopulmonary bypass (CPB)      | Contrast-induced nephropathy          | Delayed graft function (DGF)             | Intensive care or emergency setting |
|-----------------------------|-----------------------------------|---------------------------------------|------------------------------------------|-------------------------------------|
| NGAL                        | 2 h post-CPB<br>2 days pre-AKI    | 2 h post-contrast<br>1–2 days pre-AKI | 12 h post-transplant<br>2–3 days pre-DGF | 2 days pre-AKI                      |
| AUC                         | 0.78–0.99                         | 0.91–0.92                             | 0.90                                     | 0.78–0.95                           |
| References                  | [21–25,41,42]                     | [29–33]                               | [27,28]                                  | [34–36]                             |
| IL-18                       | 12 h post-CPB<br>1–2 days pre-AKI | Not increased                         | 12 h post-transplant<br>2–3 days pre-DGF | 2 days pre-AKI                      |
| AUC                         | 0.75                              |                                       | 0.90                                     | 0.73                                |
| References                  | [22]                              |                                       | [27]                                     | [64]                                |
| KIM-1                       | 12 h post-CPB<br>1–2 days pre-AKI | Not tested                            | Not tested in acute setting              | Not tested in acute setting         |
| AUC                         | 0.83                              |                                       |                                          |                                     |
| References                  | [65]                              |                                       |                                          |                                     |

NGAL, neutrophil gelatinase-associated lipocalin; IL-18, interleukin 18; KIM-1, kidney injury molecule 1; AUC, area under the receiver operating characteristic curve.

AKI is defined as a 50% or greater increase in serum creatinine from baseline and DGF is defined as dialysis requirement within the first week after transplant. Times shown are the earliest time points when the biomarker becomes significantly increased from baseline.

**Table 3.** Urinary biomarkers for the early prediction of clinical outcomes in various AKI settings

| Biomarker name | Cardiopulmonary bypass (CPB)                        | Kidney transplant             | Intensive care or emergency setting          |
|----------------|-----------------------------------------------------|-------------------------------|----------------------------------------------|
| NGAL           | Predicts AKI duration, severity, dialysis and death | Predicts AKI duration         | Predicts AKI duration, severity and dialysis |
| References     | [41,42]                                             | [27]                          | [34,36,43]                                   |
| IL-18          | Predicts AKI duration                               | Predicts AKI duration         | Predicts death                               |
| References     | [22]                                                | [27]                          | [66]                                         |
| KIM-1          | Not tested                                          | Predicts long-term graft loss | Predicts dialysis and death                  |
| References     |                                                     | [67]                          | [68]                                         |

NGAL, neutrophil gelatinase-associated lipocalin; IL-18, interleukin 18; KIM-1, kidney injury molecule 1. AKI is defined as a 50% or greater increase in serum creatinine from baseline.

massive (1000-fold) upregulation of NGAL mRNA in the thick ascending limb of Henle's loop and the collecting ducts [11]. The resultant synthesis of NGAL protein in the distal nephron and secretion into the urine appears to comprise the major fraction of urinary NGAL. Supporting clinical evidence is provided by the consistent finding of a high fractional excretion of NGAL reported in human AKI studies [11,20]. The over-expression of NGAL in the distal tubule and rapid secretion into the lower urinary tract is in accord with its teleological function as an antimicrobial strategy. It is also consistent with the proposed role for NGAL in promoting cell survival and proliferation, given the recent documentation of abundant apoptotic cell death in distal nephron segments in several animal and human models of AKI [45–48].

What about plasma NGAL in AKI? The kidney itself does not appear to be a major source, since direct ipsilateral renal vein sampling after unilateral ischemia indicates that the NGAL synthesized in the kidney is not introduced efficiently into the circulation, but is abundantly present in the ipsilateral ureter [11]. However, it is now well known that AKI results in a dramatically increased NGAL mRNA expression in distant organs [49], especially the liver and

lungs, and the over-expressed NGAL protein released into the circulation may constitute a distinct systemic pool. Additional contributions to the systemic pool in AKI may derive from the fact that NGAL is an acute phase reactant and may be released from neutrophils, macrophages and other immune cells [50]. Furthermore, any decrease in glomerular filtration rate resulting from AKI would be expected to decrease the renal clearance of NGAL, with subsequent accumulation in the systemic circulation. The relative contribution of these mechanisms to the rise in plasma NGAL after AKI remains to be determined.

### Limitations of NGAL as an AKI biomarker

Clearly, NGAL represents a novel predictive biomarker for AKI and its outcomes. However, the majority of studies published thus far have involved relatively small numbers of subjects from single centers, in which NGAL appears to be most sensitive and specific in homogeneous patient populations with predictable forms of AKI. Plasma NGAL measurements may be influenced by a number of coexisting variables such as CKD, chronic hypertension, systemic

infections, inflammatory conditions and malignancies [51–56]. In the CKD population, NGAL levels correlate with the severity of renal impairment [55,56]. However, the increase in plasma NGAL in these situations is generally much less than that typically encountered in AKI.

There is an emerging literature suggesting that urine NGAL is also a marker of CKD and its severity [1]. In subjects with CKD due to glomerulonephritides, urine NGAL levels were elevated and significantly correlated with serum creatinine, GFR and proteinuria [57]. In patients with autosomal dominant polycystic kidney disease, urine NGAL measurements correlated with residual GFR and severity of cystic disease [53]. Urine NGAL has also been shown to represent an early biomarker for the degree of chronic injury in patients with IgA nephropathy [58] and lupus nephritis [59,60], and may be increased in urinary tract infections. However, the levels of urine NGAL in these situations are significantly blunted compared to those typically measured in AKI.

## Summary

NGAL as an AKI biomarker has successfully passed through the pre-clinical, assay development and initial clinical testing stages of the biomarker development process. It has now entered the prospective screening stage, facilitated by the development of commercial tools for the measurement of NGAL in large populations across different laboratories. But will any single biomarker such as NGAL suffice in AKI? In addition to early diagnosis and prediction, it would be desirable to identify biomarkers capable of discerning AKI subtypes, identifying etiologies, predicting clinical outcomes, allowing for risk stratification and monitoring the response to interventions. In order to obtain all of this desired information, a panel of validated biomarkers may be needed. The current status of NGAL as an AKI biomarker is shown in Table 1. Other AKI panel candidates may include interleukin-18 (IL-18), kidney injury molecule-1 (KIM-1), cystatin C and liver-type fatty acid binding protein (L-FABP), to name a few [4–6]. A brief comparison of the properties of NGAL versus other promising urinary biomarkers is shown in Tables 2 and 3.

The availability of a panel of AKI biomarkers could revolutionize renal and critical care. However, such idealistic thinking must be tempered with the enormous technical and fiscal issues surrounding the identification, validation, commercial development and acceptance of multi-marker panels. Deriving from the recent cardiology literature, a clinically useful biomarker should (a) be easily measurable at a reasonable cost with short turnaround times; (b) provide information that is not already available from clinical assessment; and (c) aid in medical decision making [61]. In this respect, troponin as a stand-alone biomarker provides excellent diagnostic and prognostic information in acute coronary syndromes and acute decompensated heart failure [62], although the addition of brain natriuretic peptide does improve the risk stratification of death from cardiovascular causes [63]. If the current prospective multicenter studies of NGAL measurements with standardized labo-

ratory platforms provide promising results, we may have already closed in on the ‘renal troponin’.

**Acknowledgements.** Studies cited in this review that were performed by the author’s laboratory were supported by grants from the NIH (R01 DK53289, R01 DK069749 and R21 DK070163). The author has received limited research grant support from Biosite(R) Inc. and Abbott Diagnostics.

**Conflict of interest statements.** The views presented in this paper represent the author’s views, and have not been published previously in whole or in substantive part. Some of the information has previously been published in other reviews. Biosite(R) Inc. has signed an exclusive licensing agreement with Cincinnati Children’s Hospital for developing plasma NGAL as a biomarker of acute renal failure. Abbott Diagnostics has signed an exclusive licensing agreement with Cincinnati Children’s Hospital for developing urine NGAL as a biomarker of acute renal failure.

## References

- Nickolas TL, Barasch J, Devarajan P. Biomarkers in acute and chronic kidney disease. *Curr Opin Nephrol Hypertens* 2008; 17: 127–132
- Devarajan P. Neutrophil gelatinase-associated lipocalin (NGAL): a new marker of kidney disease. *Scand J Clin Lab Invest* 2008; 68: 89–94
- Chertow GM, Soroko SH, Paganini EP *et al.* Mortality after acute renal failure: models for prognostic stratification and risk adjustment. *Kidney Int* 2006; 70: 1120–1126
- Devarajan P. Proteomics for biomarker discovery in acute kidney injury. *Semin Nephrol* 2007; 27: 637–651
- Devarajan P. Proteomics for the investigation of acute kidney injury. *Contrib Nephrol* 2008; 160: 1–16
- Devarajan P, Parikh C, Barasch J. Case 31–2007: a man with abdominal pain and elevated creatinine. *N Engl J Med* 2008; 17:358: 312
- Devarajan P. Update on mechanisms of ischemic acute kidney injury. *J Am Soc Nephrol* 2006; 17: 1503–1520
- Cowland JB, Borregaard N. Molecular characterization and pattern of tissue expression of the gene for neutrophil gelatinase-associated lipocalin from humans. *Genomics* 1997; 45: 17–23
- Cowland JB, Sorensen OE, Schested M *et al.* Neutrophil gelatinase-associated lipocalin is up-regulated in human epithelial cells by IL-1 $\beta$  but not by TNF- $\alpha$ . *J Immunol* 2003; 171: 9366–9366
- Mishra J, Mori K, Ma Q *et al.* Amelioration of ischemic acute renal injury by neutrophil gelatinase-associated lipocalin. *J Am Soc Nephrol* 2004; 15: 3073–3082
- Schmidt-Ott KM, Mori K, Li JY *et al.* Dual action of neutrophil gelatinase-associated lipocalin. *J Am Soc Nephrol* 2007; 18: 407–413
- Meldrum KK, Hilw K, Meldrum DR *et al.* Simulated ischemia induced renal tubular cell apoptosis through a nuclear factor- $\kappa$ B dependent mechanism. *J Urol* 2002; 168: 248–252
- Haussler U, von Wichert G, Schmid RM *et al.* Epidermal growth factor activates nuclear factor- $\kappa$ B in human proximal tubule cells. *Am J Physiol Renal Physiol* 2005; 280: F808–F815
- Supavekin S, Zhang W, Kucherlapati R *et al.* Differential gene expression following early renal ischemia-reperfusion. *Kidney Int* 2003; 63: 1714–1724
- Keiran NE, Doran PP, Connolly SB *et al.* Modification of the transcriptome response to renal ischemia/reperfusion injury by lipoxin analog. *Kidney Int* 2003; 64: 480–492
- Amin RP, Vickers AE, Sistare F *et al.* Identification of putative gene based markers of renal toxicity. *Environ Health Perspect* 2004; 112: 465–479
- Yuen PST, Jo S-K, Holly MK *et al.* Ischemic and nephrotoxic acute renal failure are distinguished by their broad transcriptomic responses. *Physiol Genomics* 2006; 25: 375–386
- Mishra J, Ma Q, Prada A *et al.* Identification of neutrophil gelatinase-associated lipocalin as a novel urinary biomarker for ischemic injury. *J Am Soc Nephrol* 2003; 4: 2534–2543

19. Mishra J, Mori K, Ma Q *et al.* Neutrophil gelatinase-associated lipocalin (NGAL): a novel urinary biomarker for cisplatin nephrotoxicity. *Am J Nephrol* 2004; 24: 307–315
20. Mori K, Lee HT, Rapoport D *et al.* Endocytic delivery of lipocalin-siderophore-iron complex rescues the kidney from ischemia-reperfusion injury. *J Clin Invest* 2005; 115: 610–621
21. Mishra J, Dent C, Tarabishi R *et al.* Neutrophil gelatinase-associated lipocalin (NGAL) as a biomarker for acute renal injury following cardiac surgery. *Lancet* 2005; 365: 1231–1238
22. Parikh CR, Mishra J, Thiessen-Philbrook H *et al.* Urinary IL-18 is an early predictive biomarker of acute kidney injury after cardiac surgery. *Kidney Int* 2006; 70: 199–203
23. Portilla D, Dent C, Sugaya T *et al.* Liver fatty acid-binding protein as a biomarker of acute kidney injury after cardiac surgery. *Kidney Int* 2008; 73: 465–472
24. Wagener G, Jan M, Kim M *et al.* Association between increases in urinary neutrophil-associated lipocalin and acute renal dysfunction after adult cardiac surgery. *Anesthesiology* 2006; 105: 485–491
25. Koyner J, Bennett M, Worcester E *et al.* Urinary cystatin C: a novel early biomarker of AKI development and severity after adult cardiothoracic surgery. *Kidney Int* 2008. [Epub ahead of print] PMID: 18650797
26. Mishra J, Ma Q, Kelly C *et al.* Kidney NGAL is a novel early marker of acute injury following transplantation. *Pediatr Nephrol* 2006; 21: 856–863
27. Parikh CR, Jani A, Mishra J *et al.* Urine NGAL and IL-18 are predictive biomarkers for delayed graft function following kidney transplantation. *Am J Transplant* 2006; 6: 1639–1645
28. Kusaka M, Kuroyanagi Y, Mori T *et al.* Serum neutrophil gelatinase-associated lipocalin as a predictor of organ recovery from delayed graft function after kidney transplantation from donors after cardiac death. *Cell Transplant* 2008; 17: 129–34
29. Bachorzewska-Gajewska H, Malyszko J, Sitniewska E *et al.* Neutrophil-gelatinase-associated lipocalin and renal function after percutaneous coronary interventions. *Am J Nephrol* 2006; 26: 287–292
30. Bachorzewska-Gajewska H, Malyszko J, Sitniewska E *et al.* Neutrophil gelatinase-associated lipocalin (NGAL) correlations with cystatin C, serum creatinine and eGFR in patients with normal serum creatinine undergoing coronary angiography. *Nephrol Dial Transplant* 2007; 22: 295–296
31. Bachorzewska-Gajewska H, Malyszko J, Sitniewska E *et al.* Could neutrophil-gelatinase-associated lipocalin and cystatin C predict the development of contrast-induced nephropathy after percutaneous coronary interventions in patients with stable angina and normal serum creatinine values? *Kidney Blood Press Res* 2007; 408–415
32. Ling W, Zhaohui N, Ben H *et al.* Urinary IL-18 and NGAL as early predictive biomarkers in contrast-induced nephropathy after coronary angiography. *Nephron Clin Pract* 2008; 108: c176–c181
33. Hirsch R, Dent C, Pfiem H *et al.* NGAL is an early predictive biomarker of contrast-induced nephropathy in children. *Pediatr Nephrol* 2007; 22: 2089–2095
34. Zappitelli M, Washburn KM, Arikian AA *et al.* Urine NGAL is an early marker of acute kidney injury in critically ill children. *Crit Care* 2007; 11: R84
35. Wheeler DS, Devarajan P, Ma Q *et al.* Serum neutrophil gelatinase-associated lipocalin (NGAL) as a marker of acute kidney injury in critically ill children with septic shock. *Crit Care Med* 2008; 36: 1297–1303
36. Nickolas TL, O'Rourke MJ, Yang J *et al.* Sensitivity and specificity of a single emergency department measurement of urinary neutrophil gelatinase-associated lipocalin for diagnosing acute kidney injury. *Ann Intern Med* 2008; 148: 810–819
37. Boldt J, Brosch C, Ducke M *et al.* Influence of volume therapy with a modern hydroxyethylstarch preparation on kidney function in cardiac surgery patients with compromised renal function: a comparison with human albumin. *Crit Care Med* 2007; 35: 2740–2746
38. Boldt J, Brosch CH, Rohm K *et al.* Comparison of the effects of gelatin and a modern hydroxyethylstarch solution on renal function and inflammatory response in elderly cardiac surgery patients. *Br J Anaesth* 2008; 100: 457–464
39. Haase M, Fielitz-Haase A, Bellomo R *et al.* Sodium bicarbonate to prevent acute kidney injury after cardiac surgery: a pilot double-blind, randomised controlled trial. *Nephrol Dial Transplant* 2008; 1(Suppl. 2): ii212
40. Wagener G, Gubitosa G, Wang S *et al.* Increased incidence of acute kidney injury with aprotinin use during cardiac surgery detected with urinary NGAL. *Am J Nephrol* 2008; 28: 576–582
41. Dent CL, Ma Q, Dastrala S *et al.* Plasma NGAL predicts acute kidney injury, morbidity and mortality after pediatric cardiac surgery: a prospective uncontrolled cohort study. *Crit Care* 2007; 11: R127
42. Bennett M, Dent CL, Ma Q *et al.* Urine NGAL predicts severity of acute kidney injury after cardiac surgery: a prospective study. *Clin J Am Soc Nephrol* 2008; 3: 665–673
43. Trachtman H, Christen E, Cnaan A *et al.* Urinary neutrophil gelatinase-associated lipocalin in D+HUS: a novel marker of renal injury. *Pediatr Nephrol* 2006; 21: 989–994
44. Schaub S, Mayr M, Hönger G *et al.* Detection of subclinical tubular injury after renal transplantation: comparison of urine protein analysis with allograft histopathology. *Transplantation* 2007; 84: 104–112
45. Ma Q, Devarajan P. Induction of proapoptotic Daxx following ischemic acute kidney injury. *Kidney Int* 2008; 74: 310–318
46. Arany I. When less is more: apoptosis during acute kidney injury. *Kidney Int* 2008; 74: 261–262
47. Srichai MB, Hao C, Davis L *et al.* Apoptosis of the thick ascending limb results in acute kidney injury. *J Am Soc Nephrol* 2008; 19: 1538–1546
48. Castaneda MP, Swiatecka-Urban A, Mitsnefes MM *et al.* Activation of mitochondrial apoptotic pathways in human renal allografts after ischemia-reperfusion injury. *Transplantation* 2003; 76: 50–54
49. Grigoryev DN, Liu M, Hassoun HT *et al.* The local and systemic inflammatory transcriptome after acute kidney injury. *J Am Soc Nephrol* 2008; 19: 547–558
50. Liu Q, Nilsen-Hamilton M. Identification of a new acute phase protein. *J Biol Chem* 1995; 270: 22565–22570
51. Mitsnefes M, Kathman T, Mishra J *et al.* Serum NGAL as a marker of renal function in children with chronic kidney disease. *Pediatr Nephrol* 2007; 22: 101–108
52. Devarajan P. Neutrophil gelatinase-associated lipocalin: new paths for an old shuttle. *Cancer Therapy* 2007; 5: 463–470
53. Bolignano D, Coppolino G, Campo S *et al.* Neutrophil gelatinase-associated lipocalin in patients with autosomal-dominant polycystic kidney disease. *Am J Nephrol* 2007; 27: 373–378
54. Malyszko J, Bachorzewska-Gajewska H, Malyszko JS *et al.* Serum neutrophil gelatinase-associated lipocalin as a marker of renal function in hypertensive and normotensive patients with coronary artery disease. *Nephrology (Carlton)* 2008; 13: 153–156
55. Malyszko J, Bachorzewska-Gajewska H, Sitniewska E *et al.* Serum neutrophil gelatinase-associated lipocalin as a marker of renal function in non-diabetic patients with stage 2–4 chronic kidney disease. *Renal Failure* 2008; 30: 1–4
56. Bolignano D, Lacquaniti A, Coppolino G *et al.* Neutrophil gelatinase-associated lipocalin reflects the severity of renal impairment in subjects affected by chronic kidney disease. *Kidney Blood Press Res* 2008; 31: 255–258
57. Bolignano D, Coppolino G, Campo S *et al.* Urinary neutrophil gelatinase-associated lipocalin (NGAL) is associated with severity of renal disease in proteinuric patients. *Nephrol Dial Transplant* 2008; 23: 414–416
58. Ding H, He Y, Li K *et al.* Urinary neutrophil gelatinase-associated lipocalin (NGAL) is an early biomarker for renal tubulointerstitial injury in IgA nephropathy. *Clin Immunol* 2007; 123: 227–234
59. Brunner HI, Mueller M, Rutherford C *et al.* Urinary NGAL as a biomarker of nephritis in childhood-onset SLE. *Arthritis Rheum* 2006; 54: 2577–2584
60. Suzuki M, Wiers KM, Klein-Gitelman MS *et al.* Neutrophil gelatinase-associated lipocalin as a biomarker of disease activity in pediatric lupus nephritis. *Pediatr Nephrol* 2008; 23: 403–412

61. Braunwald E. Biomarkers in heart disease. *N Engl J Med* 2008; 358: 2148–2159
62. Peacock FW IV, De Marco T, Fonarow GC *et al.* Cardiac troponin and outcome in acute heart failure. *N Engl J Med* 2008; 358: 2117–2126
63. Zethelius B, Berglund L, Sundstrom J *et al.* Use of multiple biomarkers to improve the prediction of death from cardiovascular causes. *N Engl J Med* 2008; 358: 2107–2116
64. Washburn KK, Zappitelli M, Arikian AA *et al.* Urinary interleukin-18 is an acute kidney injury biomarker in critically ill children. *Nephrol Dial Transplant* 2008; 23: 566–572
65. Han WK, Waikar SS, Johnson A *et al.* Urinary biomarkers in the early diagnosis of acute kidney injury. *Kidney Int* 2008; 73: 863–869
66. Parikh CR, Abraham E, Ancukiewicz M *et al.* Urine IL-18 is an early diagnostic marker for acute kidney injury and predicts mortality in the intensive care unit. *J Am Soc Nephrol* 2005; 16: 3046–3052
67. van Timmeren MM, Vaidya VS, van Ree RM *et al.* High urinary excretion of kidney injury molecule-1 is an independent predictor of graft loss in renal transplant recipients. *Transplantation* 2007; 84: 1625–1630.
68. Liangos O, Perianayagam MC, Vaidya VS *et al.* Urinary N-acetyl-beta-(D)-glucosaminidase activity and kidney injury molecule-1 level are associated with adverse outcomes in acute renal failure. *J Am Soc Nephrol* 2007; 18: 904–912

Received for publication: 17.6.08

Accepted in revised form: 1.9.08

Nephrol Dial Transplant (2008) 23: 3743–3745

doi: 10.1093/ndt/gfn561

Advance Access publication 13 October 2008

## A little help from our friends: what an epidemiologic study teaches us about autoinflammation, granuloma and proteinase-3-specific antineutrophil cytoplasmic autoantibodies

Peter Lamprecht and Wolfgang L. Gross

University of Lübeck, Department of Rheumatology, Vasculitis Center UKSH & Rheumaklinik Bad Bramstedt, Ratzeburger Allee 160, 23538 Lübeck, Germany

**Keywords:** ANCA; autoinflammation; myeloperoxidase; proteinase 3; vasculitis

The standard epidemiologic approach to complex diseases tracks down differences in incidence and prevalence rates between distinct populations. Thereby, the potential impact of genetic susceptibility and/or environmental factors will be elucidated and can be dissected on the molecular biologic level in further studies. In this journal issue of *Nephrology Dialysis Transplantation*, Watts *et al.* [1] report on the incidence of renal vasculitis in a population from the Norwich area, UK. The authors compared these data on renal involvement in the three anti-neutrophil cytoplasmic autoantibody (ANCA)-associated vasculitides (AAV) Wegener's granulomatosis (WG), microscopic polyangiitis (MPA) and Churg Strauss syndrome (CSS), to recently published incidence rates of a Japanese population [1,2]. The overall incidence rate of renal vasculitis was similar in the UK and Japan (12.2/10<sup>6</sup> versus 14.8/10<sup>6</sup>). The incidence of WG (5.8/10<sup>6</sup>) in the UK was slightly lower, that of MPA

(4.9/10<sup>6</sup>) slightly higher and that of CSS (1.4/10<sup>6</sup>) comparable to that of newly diagnosed WG, MPA and CSS patients in central Europe [1,3]. However, no WG or CSS patients were seen between 2000 and 2004 in the Japanese study. All patients with renal vasculitis were diagnosed to suffer from MPA (incidence 14.8/10<sup>6</sup>). ANCA with a cytoplasmic fluorescence pattern (C-ANCA) and proteinase-3-specific (PR3)-ANCA were not detected among renal vasculitis patients in Japan. ENT involvement was virtually absent and neurological involvement was significantly less frequently diagnosed in renal vasculitis patients from Japan as compared to those from the UK [1,2].

Caveats with respect to this study regard the comparison of data from a prospective (UK) and a retrospective (Japan) study (as pointed out by the authors), comparing data from a hospital-based survey (single referral centre in Norwich, UK) with a population-based analysis of the incidence of AAV (Miyazaki Prefecture, Japan), and the lack of information, how ENT, respiratory, neurological and gastrointestinal involvement were determined. For instance, the history or a questionnaire on ENT-involvement could be biased by memory, attention and other reasons. Inspection with or without further endoscopic viewing by an ENT specialist plus a MRT scan of the head demonstrating signal intensity suggestive of inflammatory tissue in the sinuses and further signs of vasculitis discloses previously unsuspected and unrecognized involvement of

*Correspondence and offprint requests to:* Peter Lamprecht, MD, University of Lübeck, Vasculitis Center UKSH & Rheumaklinik Bad Bramstedt, Ratzeburger Allee 160, 23538 Lübeck, Germany. Tel: +0049-451-500-2368; Fax: +0049-451-500-3650; E-mail: peter.lamprecht@rheuma.uni-luebeck.de
